# Supplementary material for: A Fourteen Gene GBM Prognostic Signature Identifies Association of Immune Response Pathway and Mesenchymal Subtype with High Risk Group
Source: PLoS One. 2013 Apr 30;8(4):e62042. doi: 10.1371/journal.pone.0062042 (PMC3639942; doi:10.1371/journal.pone.0062042)
Supplement: Table S5 — Comparison of gene expression in present data set and TCGA data set. (DOCX) [file pone.0062042.s007.docx]

**Supplementary table S5:** Comparison of gene expression in present data set and TCGA data set

| **Sl**  **No** | **Gene**  **name** | **Present cohort (PCR array)** | | | | **TCGA** | | | |
| --- | --- | --- | --- | --- | --- | --- | --- | --- | --- |
| **Normal (Mean±SD)** | **GBM (Mean±SD)** | **P-value*** | **Regulation** | **Normal(Mean±SD)** | **GBM (Mean±SD)** | **P-value*** | **Regulation** |
| 1 | AGT | -0**.**085±0**.**887 | -1**.**683±3**.**886 | 0**.**1415 | unregulated | 7**.**451e-10±0**.**202 | -0**.**018±1**.**350 | 0**.**6110 | unregulated |
| 2 | EGFR | 0**.**001±0**.**733 | 2**.**317±3**.**172 | < 0**.**0001 | upregulated | -1**.**480e-8±0**.**253 | 2**.**378±2**.**171 | < 0**.**0001 | upregulated |
| 3 | CHI3L1 | -0**.**001±1**.**097 | 5**.**205±3**.**051 | < 0**.**0001 | upregulated | -1**.**863e-8±0**.**5292 | 1**.**915±1**.**286 | < 0**.**0001 | upregulated |
| 4 | SOD2 | 0**.**001000±0**.**6761 | 1**.**795±2**.**104 | < 0**.**0001 | upregulated | 8**.**941e-9±0**.**414 | 2**.**108±1**.**264 | < 0**.**0001 | upregulated |
| 5 | CCL2 | -0**.**001±1**.**845 | 0**.**562±2**.**112 | 0**.**2218 | unregulated | 1**.**788e-8±1**.**976 | 1**.**283±1**.**560 | 0**.**0627 | unregulated |
| 6 | IGFBPL1 | -0**.**0005000±1**.**983 | 0**.**5948±3**.**188 | 0**.**3785 | unregulated | -2**.**049e-9±0**.**147 | 0**.**010±0**.**510 | 0**.**3710 | unregulated |
| 7 | MBP | -3**.**912e-9±1**.**402 | -5**.**873±3**.**048 | < 0**.**0001 | downregulated | -1**.**397e-9±0**.**215 | -2**.**131±1**.**181 | < 0**.**0001 | downregulated |
| 8 | CPE | 2**.**980e-9±0**.**817 | -1**.**657±1**.**978 | < 0**.**0001 | downregulated | 2**.**980e-9±0**.**225 | -1**.**535±1**.**061 | < 0**.**0001 | downregulated |
| 9 | OLFM1 | -0**.**001±0**.**650 | -4**.**069±1**.**997 | < 0**.**0001 | downregulated | -4**.**657e-10±0**.**148 | -2**.**299±0**.**9728 | < 0**.**0001 | downregulated |
| 10 | MCF | 0**.**001±0**.**872 | -2**.**862±2**.**513 | < 0**.**0001 | downregulated | -8**.**382e-9±0**.**672 | -3**.**726±1**.**323 | < 0**.**0001 | downregulated |
| 11 | PACSIN1 | 0**.**001±0**.**609 | -6**.**332±2**.**466 | < 0**.**0001 | downregulated | 0**.**000±0**.**3011 | -4**.**553±1**.**544 | < 0**.**0001 | downregulated |
| 12 | CALCRL | 0**.**163±0**.**733 | 1**.**450±2**.**465 | < 0**.**0001 | upregulated | -7**.**451e-10±0**.**286 | 1**.**948±1**.**210 | < 0**.**0001 | upregulated |
| 13 | SNCA | 0**.**002±0**.**639 | -4**.**027±1**.**637 | < 0**.**0001 | downregulated | 7**.**451e-10±0**.**161 | -4**.**107±1**.**288 | < 0**.**0001 | downregulated |
| 14 | TOP2A | 0**.**001±1**.**287 | 8**.**277±2**.**116 | < 0**.**0001 | upregulated | -3**.**073e-9±0**.**205 | 2**.**866±1**.**195 | < 0**.**0001 | upregulated |

* P-value from Mann-Whitney test that shows the difference between normals and GBMs; SD- standard deviation
