# Supplementary material for: A Fourteen Gene GBM Prognostic Signature Identifies Association of Immune Response Pathway and Mesenchymal Subtype with High Risk Group
Source: PLoS One. 2013 Apr 30;8(4):e62042. doi: 10.1371/journal.pone.0062042 (PMC3639942; doi:10.1371/journal.pone.0062042)
Supplement: Table S8 — The expression pattern of genes in low risk and high risk groups in the TCGA data set. (DOCX) [file pone.0062042.s010.docx]

**Supplementary table S8:** The expression pattern of genes in low risk and high risk groups in the TCGA data set

| **Sl No** | **Gene symbol** | **Low risk** | | | **High risk** | | |
| --- | --- | --- | --- | --- | --- | --- | --- |
| **Median** | **Mean** | **SD*** | **Median** | **Mean** | **SD*** |
| 1 | AGT | -0**.**013 | -0**.**112 | 1**.**483 | 0**.**296 | 0**.**096 | 1**.**303 |
| 2 | EGFR | 1**.**942 | 2**.**361 | 2**.**141 | 1**.**655 | 2**.**282 | 2**.**046 |
| 3 | CHI3L1 | 1**.**407 | 1**.**037 | 1**.**571 | 2**.**347 | 2**.**362 | 0**.**864 |
| 4 | SOD2 | 1**.**419 | 1**.**534 | 1**.**185 | 2**.**424 | 2**.**398 | 1**.**110 |
| 5 | CCL2 | -0**.**021 | -0**.**081 | 1**.**343 | 1**.**920 | 1**.**843 | 1**.**207 |
| 6 | IGFBPL1 | 0**.**187 | 0**.**323 | 0**.**707 | -0**.**139 | -0**.**028 | 0**.**417 |
| 7 | MBP | -2**.**546 | -2**.**666 | 1**.**072 | -1**.**779 | -1**.**992 | 1**.**082 |
| 8 | CPE | -1**.**629 | -1**.**733 | 1**.**205 | -1**.**614 | -1**.**509 | 0**.**893 |
| 9 | OLFM1 | -2**.**372 | -2**.**510 | 0**.**776 | -2**.**210 | -2**.**287 | 0**.**857 |
| 10 | MCF | -3**.**763 | -3**.**571 | 1**.**280 | -4**.**167 | -4**.**110 | 0**.**897 |
| 11 | PACSIN1 | -5**.**456 | -5**.**253 | 0**.**851 | -4**.**912 | -4**.**553 | 1**.**248 |
| 12 | CALCRL | 2**.**619 | 2**.**570 | 1**.**132 | 1**.**655 | 1**.**692 | 1**.**061 |
| 13 | SNCA | -5**.**202 | -4**.**967 | 0**.**963 | -4**.**070 | -4**.**071 | 0**.**765 |
| 14 | TOP2A | 3**.**614 | 3**.**512 | 1**.**134 | 2**.**828 | 2**.**835 | 0**.**945 |

*****SD - Standard deviation
